# Supplementary material for: Mobocertinib in Patients with EGFR Exon 20 Insertion-Positive Non-Small Cell Lung Cancer (MOON): An International Real-World Safety and Efficacy Analysis
Source: MDPI journal article supplement (doi:10.3390/ijms25073992), 2024-04-03
Supplement: s1 [file s1]

---

**Supplementary Material**

**Table S1: Additional Patient Characteristics**

**Table S2: Exploratory analysis of covariates for progression-free survival**

**Table S3: In vitro sensitivity of EGFR exon 20 mutation with or without EGFR p.G721S to EGFR inhibitors**

**Table S4: EGFR mutation subtypes**

**Figure S1: Amivantamab following progression to mobocertinib**

**Figure S2: Treatment related adverse events**

**Methods S1: Targets of custom NGS panels**

**Table S1: Additional Patient Characteristics**

| Demographics <sup>a</sup>                                | All patients (N=86) | Treatment-naïve patients (N=14) | Pretreated patients (N=72) |
|----------------------------------------------------------|---------------------|---------------------------------|----------------------------|
| Age, years                                               |                     |                                 |                            |
| Range                                                    | 25-88               | 50-88                           | 25-86                      |
| < 65                                                     | 38 (44)             | 3 (21)                          | 35 (49)                    |
| ≥65                                                      | 48 (56)             | 11 (79)                         | 37 (51)                    |
| Race, n (%)                                              |                     |                                 |                            |
| Asian                                                    | 1 (1)               | 0 (0)                           | 1 (1)                      |
| Non-Asian                                                | 85 (99)             | 14 (100)                        | 71 (99)                    |
| Stage at initial diagnosis, n (%)                        |                     |                                 |                            |
| Stage I                                                  | 2 (2)               | 1 (7)                           | 1 (1)                      |
| Stage II                                                 | 7 (8)               | 3 (21)                          | 4 (6)                      |
| Stage III                                                | 11 (13)             | 2 (14)                          | 9 (13)                     |
| Stage IIIa                                               | 5 (6)               | 1 (7)                           | 4 (6)                      |
| Stage IIIb                                               | 4 (5)               | 1 (7)                           | 3 (4)                      |
| Stage IIIc                                               | 2 (2)               | 0 (0)                           | 2 (3)                      |
| Stage IV                                                 | 64 (74)             | 8 (57)                          | 56 (78)                    |
| Stage IVa                                                | 18 (21)             | 3 (21)                          | 15 (21)                    |
| Stage IVb                                                | 48 (56)             | 5 (36)                          | 43 (60)                    |
| Stage at mobocertinib initiation, n (%)                  |                     |                                 |                            |
| Stage III                                                | 1 (1)               | 1 (7)                           | 0                          |
| Stage IV                                                 | 85 (99)             | 13 (93)                         | 72                         |
| Location of metastasis at mobocertinib initiation, n (%) |                     |                                 |                            |
| Bone                                                     | 48 (56)             | 5 (36)                          | 39 (54)                    |

|                                           |         |         |         |
|-------------------------------------------|---------|---------|---------|
| Lung                                      | 43 (50) | 9 (64)  | 38 (53) |
| Pleura                                    | 29 (34) | 1 (7)   | 25 (35) |
| Brain                                     | 25 (29) | 4 (29)  | 23 (32) |
| Liver                                     | 20 (23) | 2 (14)  | 19 (26) |
| Adrenal gland                             | 11 (13) | 1 (7)   | 10 (14) |
| Lymph nodes                               | 14 (16) | 1 (7)   | 13 (18) |
| Other                                     | 17 (20) | 2 (14)  | 15 (21) |
| Site of metastasis, n (%)                 |         |         |         |
| 0- 1                                      | 29 (34) | 8 (57)  | 21 (29) |
| 2-3                                       | 40 (47) | 4 (29)  | 36 (50) |
| >3                                        | 19 (22) | 2 (14)  | 17 (24) |
| Brain metastasis at baseline, n (%)       |         |         |         |
| Asymptomatic                              | 16 (19) | 3 (21)  | 13 (18) |
| Symptomatic                               | 7 (8)   | 1 (7)   | 6 (8)   |
| Unknown                                   | 5 (6)   | 0 (0)   | 5 (7)   |
| Previous regimens curative setting, n (%) |         |         |         |
| Neoadjuvant                               | 2 (2)   | 0 (0)   | 2 (3)   |
| Adjuvant                                  | 11 (13) | 3 (21)  | 8 (11)  |
| Definitive Chemoradiotherapy with         |         |         |         |
| Immunotherapy                             | 1 (1)   | 1 (7)   | 0 (0)   |
| Radiotherapy, n (%)                       |         |         |         |
| Prior to mobocertinib administration      |         |         |         |
| Patients without radiotherapy             | 59 (69) | 10 (71) | 49 (68) |
| Neoadjuvant or post-operative             | 4 (5)   | 0 (0)   | 4 (6)   |
| thoracic radiotherapy                     |         |         |         |

|                                       |         |         |         |
|---------------------------------------|---------|---------|---------|
| Stereotactic radiotherapy of brain    | 10 (12) | 3 (21)  | 7 (10)  |
| metastasis                            |         |         |         |
| Palliative radiotherapy of bone or    | 11 (13) | 3 (21)  | 8 (11)  |
| soft-tissue metastasis                |         |         |         |
| Stereotactic radiotherapy for oligo   | 2 (2)   | 0 (0)   | 2 (3)   |
| metastasis                            |         |         |         |
| Whole brain radiotherapy              | 3 (3)   | 0 (0)   | 3 (4)   |
| Palliative thoracic radiotherapy with | 3 (3)   | 1 (7)   | 2 (3)   |
| or without lymph nodes                |         |         |         |
| During mobocertinib administration    |         |         |         |
| No radiotherapy                       | 78 (91) | 13 (93) | 65 (90) |
| Stereotactic radiotherapy of brain    | 2 (2)   | 0 (0)   | 2 (3)   |
| metastasis                            |         |         |         |
| Palliative radiotherapy of bone or    | 4 (5)   | 1 (7)   | 3 (4)   |
| soft-tissue metastasis                |         |         |         |

---

Data cut-off date: 05-Apr-2023. <sup>a</sup>Percentage may not be 100 because of rounding.

**Table S2: Exploratory analysis of covariates for progression-free survival**

| Variable                                          | Availability of Data | Hazard Ratio (95% CI) | P-value for Cox regression | Proportional hazards assumption |
|---------------------------------------------------|----------------------|-----------------------|----------------------------|---------------------------------|
| TP53: mutation vs. wildtype                       | N = 55 / 86 (64%)    | 0.959 (0.526 – 1.747) | 0.891                      | True                            |
| Mobo given in firstline vs. later line            | N = 86/86 (100%)     | 1.346 (0.685 – 2.642) | 0.389                      | Not true                        |
| Baseline brain metastases vs. no brain metastases | N = 86/86 (100%)     | 0.358 (0.209 – 0.615) | <0.001                     | True                            |
| ECOG 0 vs. ECOG 1-3                               | N = 86/86 (100%)     | 0.585 (0.358 – 0.956) | 0.32                       | True                            |
| Female vs. male                                   | N = 86/86 (100%)     | 0.977 (0.571 – 1.672) | 0.934                      | True                            |
| Age ≤ 65 years vs. > 65 years                     | N = 86/86 (100%)     | 1.112 (0.685 – 1.805) | 0.668                      | Not true                        |
| Discontinuation due to AE vs. no discontinuation  | N = 86/86 (100%)     | 0.426 (0.231 – 0.787) | 0.006                      | True                            |
| Near-loop vs. far-loop mutation                   | N = 65/86 (76%)      | 0.961 (0.404 – 2.285) | 0.928                      | Not true                        |

Hazard ratios and p-values were calculated using standard Cox regression without adjustment for multiple testing. The proportional hazards assumption was assessed visually on Kaplan-Meier plots. Significant results are labelled blue. Mobo = Mobocertinib. AE = Adverse event.

**Table S3: In vitro sensitivity of EGFR exon 20 mutation with or without EGFR p.G721S to EGFR inhibitors**

| Mutation                 | Erlotinib | Gefitinib | Osimertinib | Afatinib | Pozotinib | Mobo-certinib |
|--------------------------|-----------|-----------|-------------|----------|-----------|---------------|
| p.L858R                  | 8,7       | 6,0       | 9,3         | 0,6      | 0,2       | 2,6           |
| p.L858R + p.T790M        | N.A.      | N.A       | 34,2        | 98,4     | 26,6      | 32,8          |
| p.D770_772dup            | >3000     | >3000     | 312,6       | 82,8     | 2,4       | 45,4          |
| p.S768_D770dup           | >3000     | >3000     | 262,9       | 57,1     | 0,6       | 21,2          |
| p.S768_D770dup + p.G721S | >3000     | >3000     | 252,3       | 53,1     | 0,7       | 22,2          |

Ba/F3 cells retrovirally transduced with overexpression vectors encoding the EGFR exon 20 insertion p.S768\_D770dup alone or in combination with the acquired EGFR p.G721S variant, and controls were deprived of IL-3 and treated with different concentrations of the indicated EGFR inhibitors. Half maximal inhibitory concentration (IC50) is provided in nM.

**Table S4: EGFR mutation subtypes**

| Region                                    | Mutation             | Number of patients |
|-------------------------------------------|----------------------|--------------------|
| $\alpha$ C helix                          | p.A763_Y764insFQEA   | 2                  |
| $\alpha$ C helix (but resistant to EGFRi) | p.Y764_V765insHH     | 1                  |
| Near-loop mutations                       | p.A767_S768insTLA    | 1                  |
|                                           | p.A767_V769dup       | 15                 |
|                                           | p.S768_D770dup       | 8                  |
|                                           | p.V769_D770insQ      | 1                  |
|                                           | p.V769_D770insTSV    | 1                  |
|                                           | p.D770_N771insGF     | 1                  |
|                                           | p.D770_N771insGL     | 1                  |
|                                           | p.D770_N771insSVQ    | 1                  |
|                                           | p.D770delinsGY       | 1                  |
|                                           | p.D770_P772dup       | 2                  |
|                                           | p.D770_N771insG      | 6                  |
|                                           | p.N771dup            | 1                  |
|                                           | p.N771_H773delinsLM  | 1                  |
|                                           | p.N771_P772insT      | 1                  |
|                                           | p.N771delinsGF       | 1                  |
|                                           | p.N771delinsKH       | 2                  |
|                                           | p.N771_H773dup       | 6                  |
|                                           | p.P772_H773dup       | 1                  |
|                                           | p.P772_H773insPNP    | 1                  |
| Far-loop mutations                        | p.H773dup            | 6                  |
|                                           | p.H773_C775delinsPTP | 1                  |
|                                           | p.H773_V774delinsLM  | 1                  |
|                                           | p.H773_V774dup       | 1                  |
|                                           | p.H773_V774insPHPH   | 1                  |

Amino acid changes as predicted from DNA variants based on transcript NM\_005228.5 / ENST00000275493.7. Near-loop/Far-loop classification is based on Robichaux et al.<sup>9</sup> Sequencing was performed by massive parallel sequencing panel analysis (NGS) and region-specific PCR assays in 87% and 13% of cases, respectively. Exact mutation name as depicted here was available for 65 of 86 patients.

Figure S1: Amivantamab following progression to mobocertinib

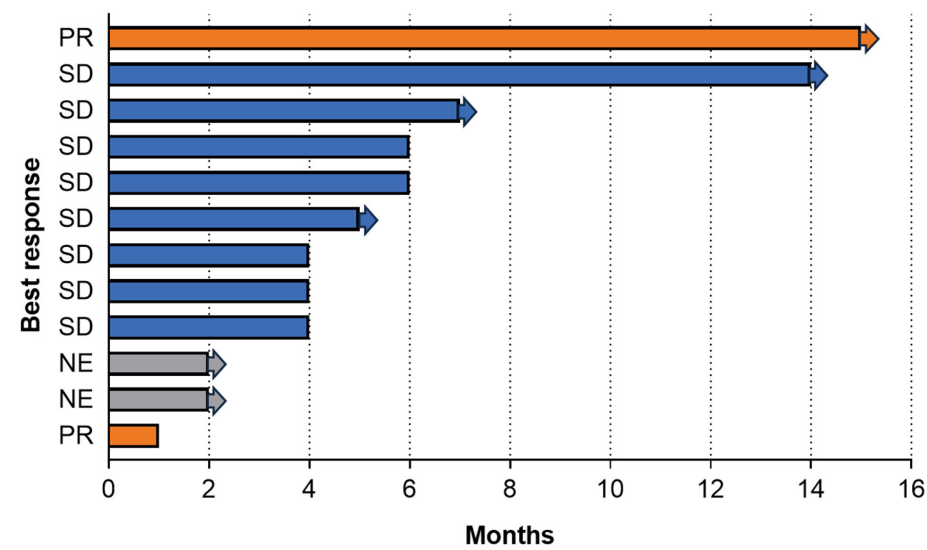

Swimmer plot for time on treatment. Arrows indicating ongoing treatment. Colors correspond to best objective response to amivantamab. PR: partial response (orange). SD: stable disease (blue). NE: not estimated (grey).

**Figure S2: Treatment related adverse events**

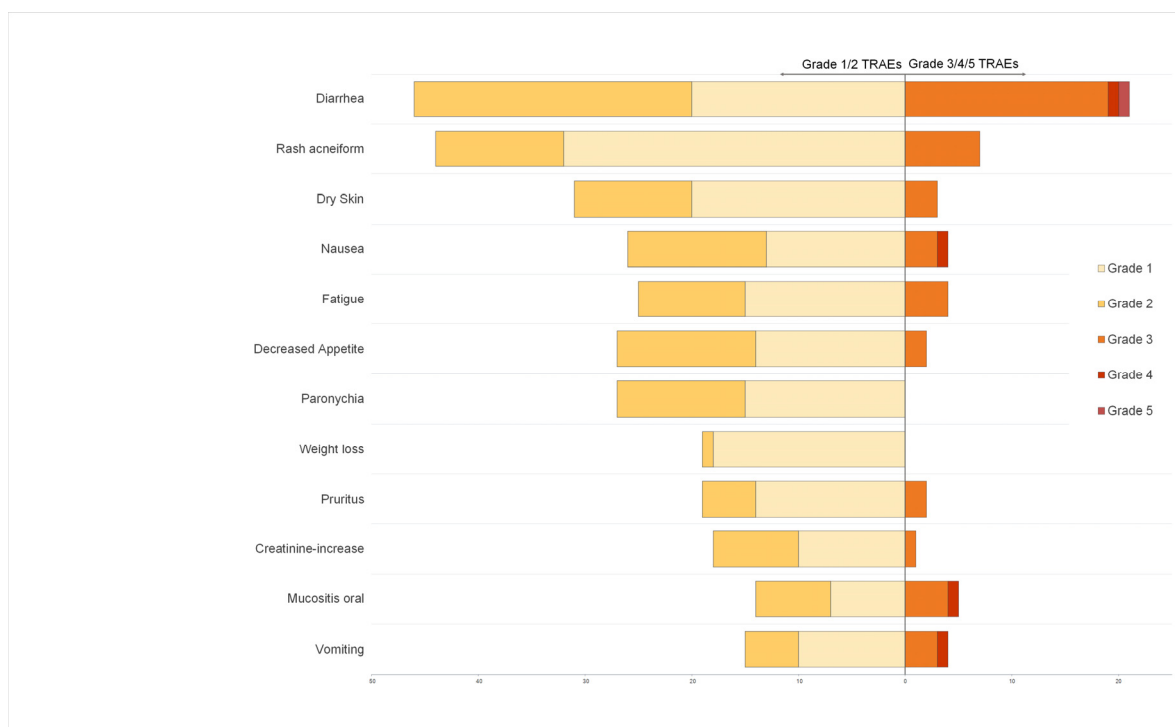

Data cut-off date: 05-Apr-2023. Treatment-related adverse events (TRAEs) that occurred at any grade in at least 20% of patients. The X-axis shows the number of patients who experienced the TRAE. The analysis included all patients who received at least one dose of mobocertinib. Relatedness of any adverse event to the treatment was assessed by the treating physician. TRAEs were graded as per Common Terminology Criteria for Adverse Events (CTCAE, version 5.0). Grading was not available for one case of diarrhea and fatigue and two cases of weight loss. Percentage may not equal to 100 because of rounding.



## Methods S1: Targets of custom EGFR panels

|                                                       | Gene   | Transcript ID      | Exons                        | Gene    | Transcript ID      | Exons                  |
|-------------------------------------------------------|--------|--------------------|------------------------------|---------|--------------------|------------------------|
| nNGM Panel<br>Version 2.0                             | ALK    | ENST00000389048.3  | Exon 22-25                   | BRAF    | ENST00000288602.6  | Exon 11,15             |
|                                                       | CTNNB1 | ENST00000349496    | Exon 3                       | EGFR    | ENST00000275493.2  | Exon 18-21             |
|                                                       | ERBB2  | ENST00000269571.5  | Exon 8,19,20                 | FGFR1   | ENST00000447712.2  | Exon 4-7,10,12,13-15   |
|                                                       | FGFR2  | ENST00000358487.9  | Exon 6-15,18                 | FGFR2   | ENST00000457416    | Exon 8, 9, 12, 18      |
|                                                       | FGFR3  | ENST00000440486.2  | Exon 3,6,7,9,10,12,14,16,18  | FGFR4   | ENST00000292408.4  | Exon 3,6,9,12,13,15,16 |
|                                                       | HRAS   | ENST00000311189.8  | Exon 2-4                     | IDH1    | ENST00000345146.2  | Exon 4                 |
|                                                       | IDH2   | ENST00000330062.3  | Exon 4                       | KEAP1   | ENST00000171111.10 | Exon 2-6               |
|                                                       | KRAS   | ENST00000311936.7  | Exon 2-4                     | MAP2K1  | ENST00000307102.5  | Exon 2,3               |
|                                                       | MET    | ENST00000397752.3  | Intron 13,14 + Exon 14,16-19 | NRAS    | ENST00000369535.4  | Exon 2-4               |
|                                                       | NTRK1  | ENST00000524377.5  | Exon 13-17                   | NTRK2   | ENST00000277120.7  | Exon 14-19             |
|                                                       | NTRK3  | ENST00000360948.6  | Exon 15-20                   | PIK3CA  | ENST00000263967.3  | Exon 8, 10,21          |
|                                                       | PTEN   | ENST00000371953.3  | Exon 1-8                     | RET     | ENST00000355710.8  | Exon 10-18             |
|                                                       | ROS1   | ENST00000326873.11 | Exon 34-41                   | STK11   | ENST00000326873.11 | Exon 1-9               |
|                                                       | TP53   | ENST00000269305.4  | Exon 4-8                     |         |                    |                        |
| Mini-nNGM Panel<br>Version 2.0                        | ALK    | ENST00000389048.3  | Exon 22-25                   | BRAF    | ENST00000288602.6  | Exon 11,15             |
|                                                       | EGFR   | ENST00000275493.2  | Exon 18-21                   | KRAS    | ENST00000311936.7  | Exon 2-4               |
|                                                       | MET    | ENST00000397752.3  | Intron 13,14 + Exon 14,16-19 | NRAS    | ENST00000369535.4  | Exon 2-4               |
|                                                       | PIK3CA | ENST00000263967.3  | Exon 8, 10,21                |         |                    |                        |
| RNA Scan<br>CFHS-10224Z-571 Panel<br>Whole Genes only | ALK    | BAG4               | BRAF                         | CCDC6   | CD74               | CUX1                   |
|                                                       | DCBLD1 | EGFR               | EGFR-AS1                     | EML4    | ETV6               | EZR                    |
|                                                       | FGFR1  | FGFR2              | FGFR3                        | GOPC    | HIP1               | KIF5B                  |
|                                                       | KLC1   | LOC107984219       | LOC107985874                 | LRIG3   | MET                | MPRIP                  |
|                                                       | NRG1   | NTRK1              | NTRK2                        | NTRK3   | NTRK3-AS1          | RAD51                  |
|                                                       | RET    | ROS1               | SDC4                         | SLC34A2 | STRN               | TACC3                  |
|                                                       | TFG    | TPM3               | TPR                          | TRIM33  |                    |                        |
